# Supplementary material for: Improvement in Dibenzofuran-Based Hole Transport Materials for Flexible Perovskite Solar Cells
Source: MDPI journal article supplement (doi:10.3390/molecules29061208), 2024-03-08
Supplement: s1 [file s1]

# Supporting Materials

## 1. Structural characterization of intermediate compounds and HTMs

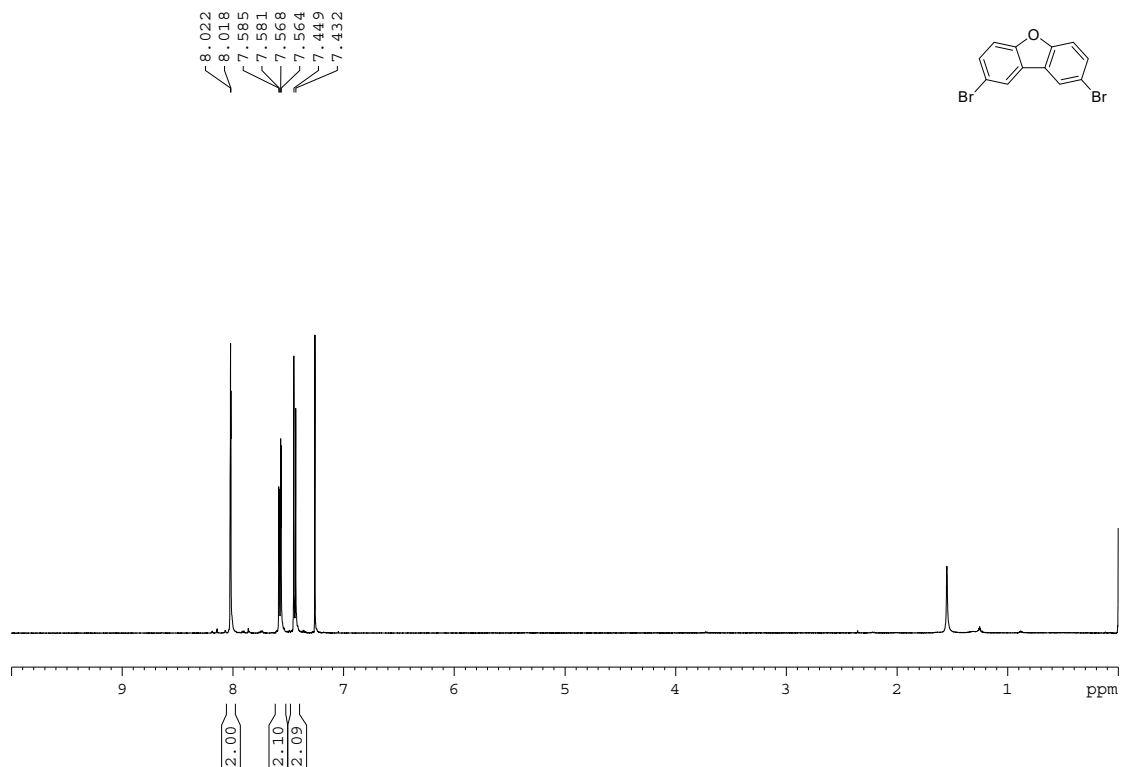

Figure. S1 <sup>1</sup>H NMR spectrum of **1**.

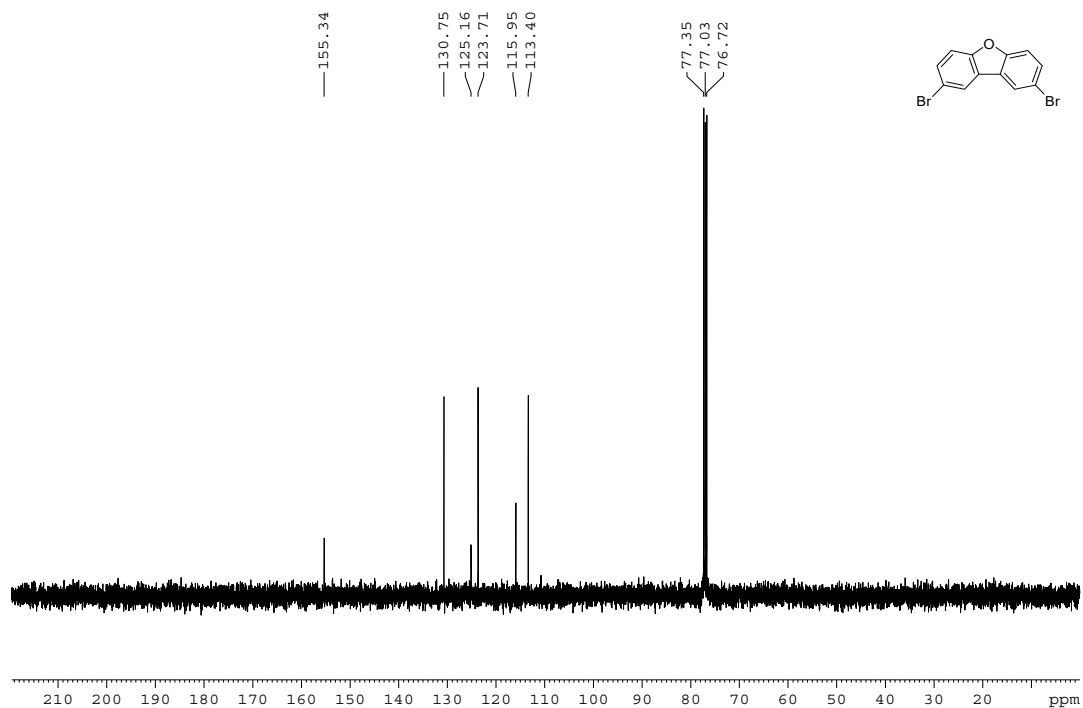

Figure. S2 <sup>13</sup>C NMR spectrum of **1**.

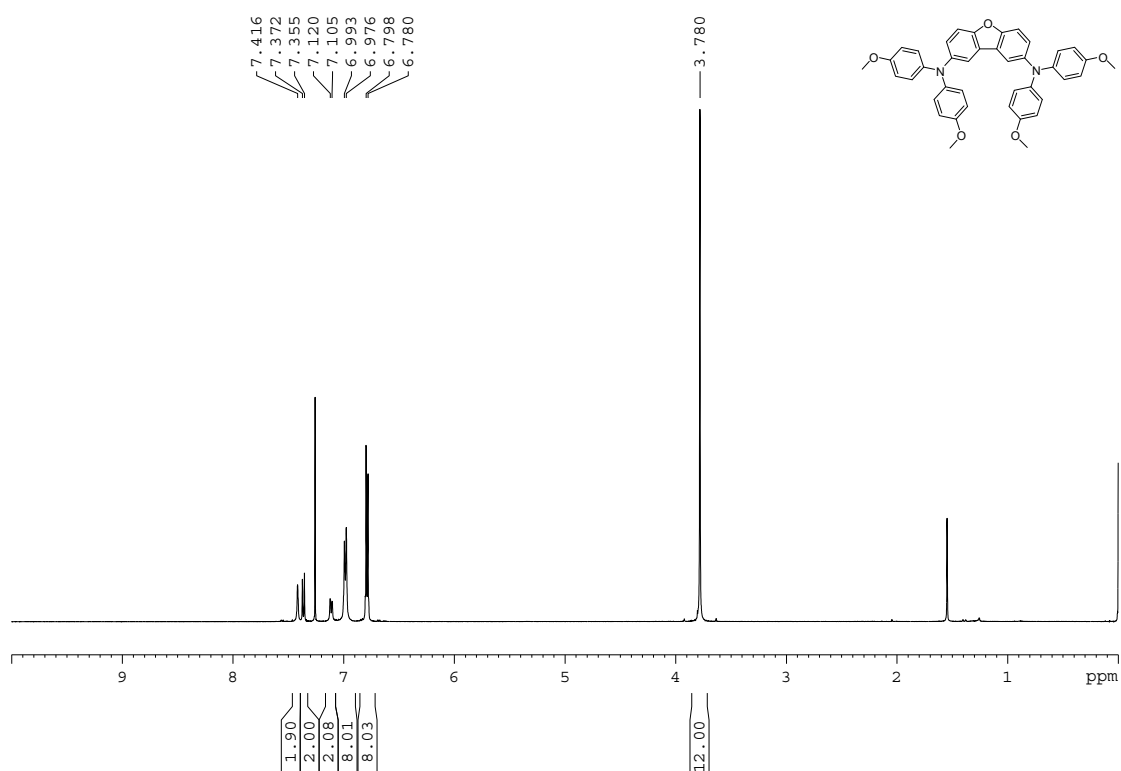

**Figure. S3** <sup>1</sup>H NMR spectrum of mDBF.

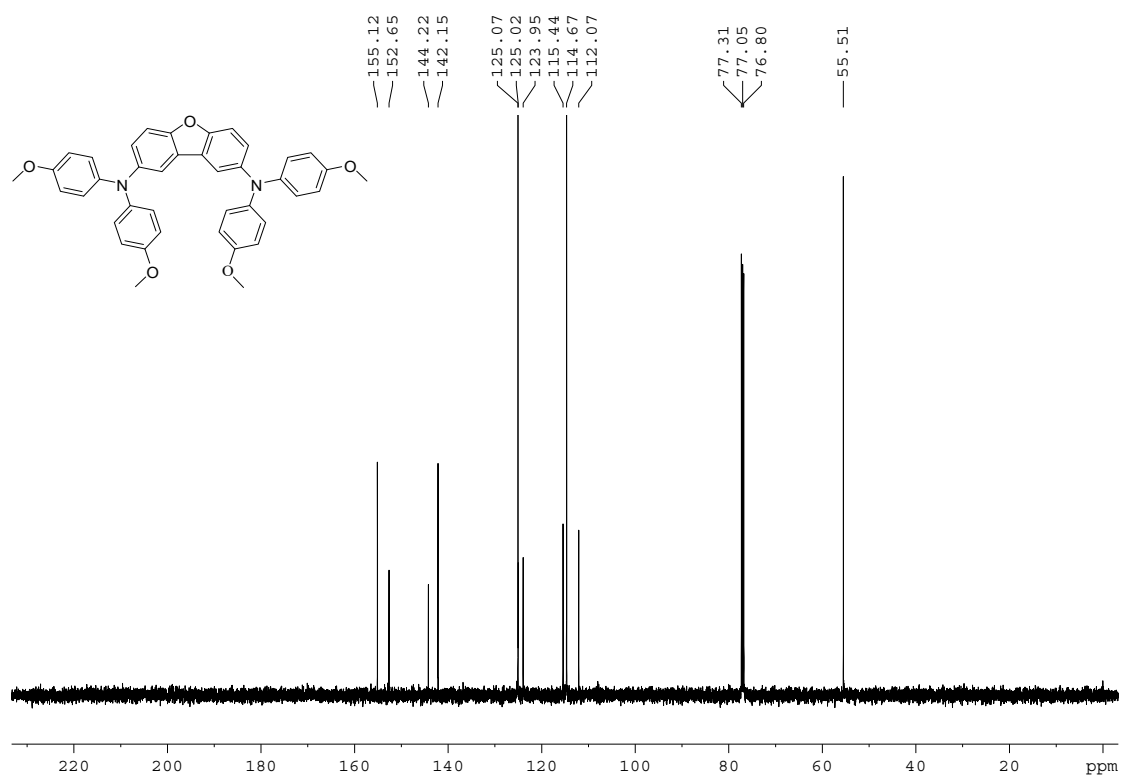

**Figure. S4.** <sup>13</sup>C NMR spectrum of mDBF.

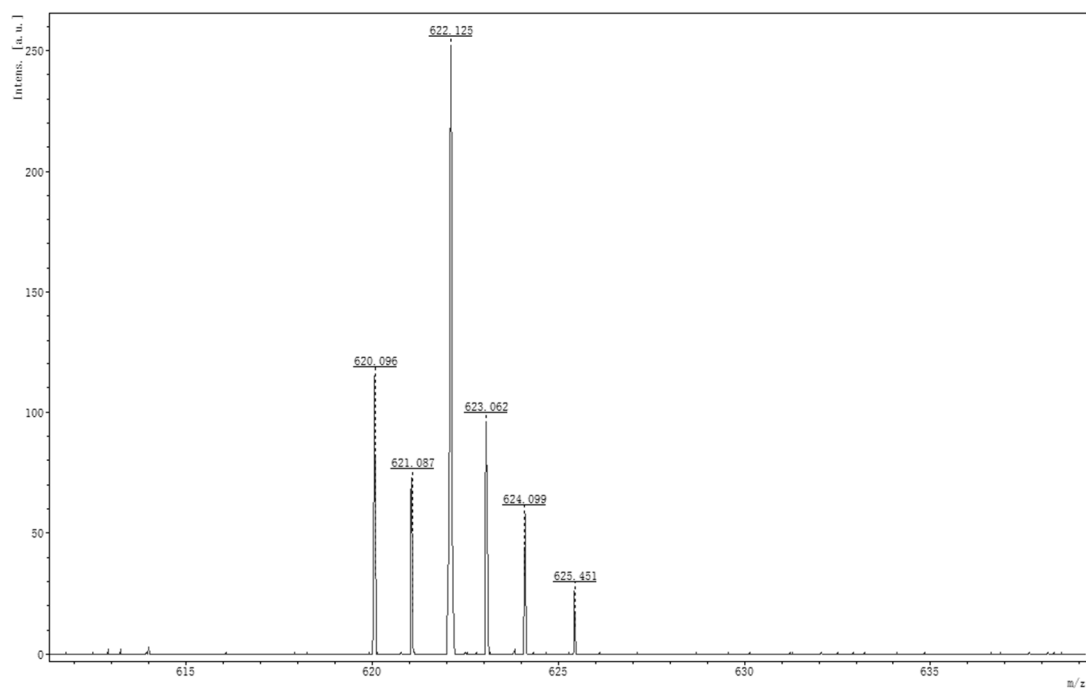

**Figure. S5.** MALDI-TOF mass spectrometry of mDBF.

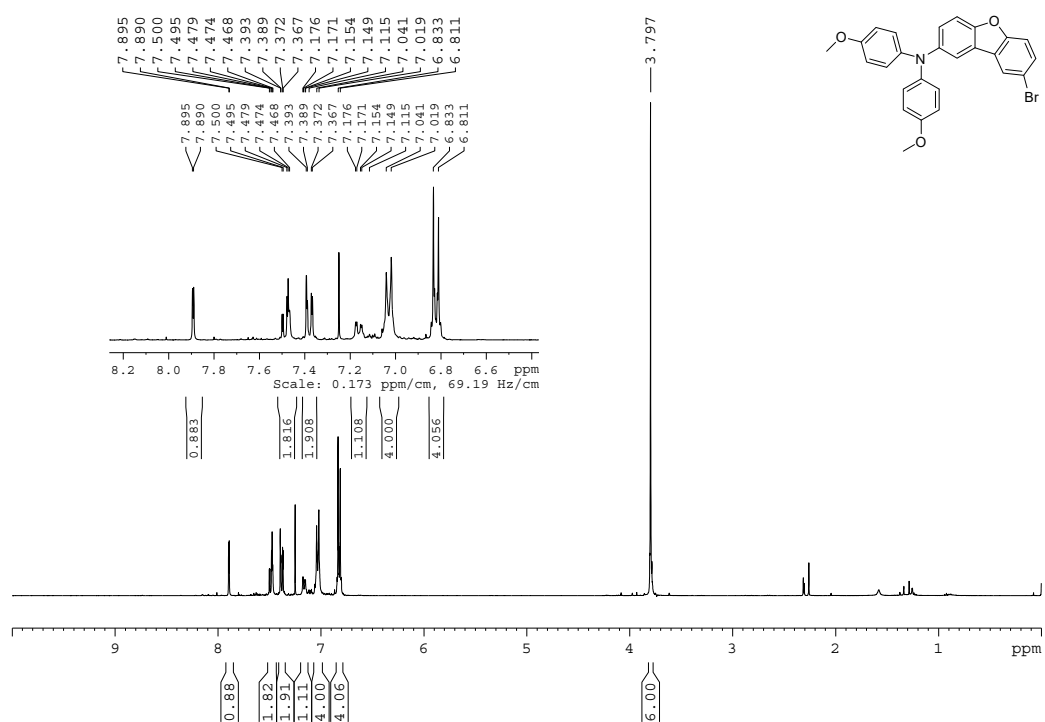

**Figure. S6**  $^1\text{H}$  NMR spectrum of **2**.

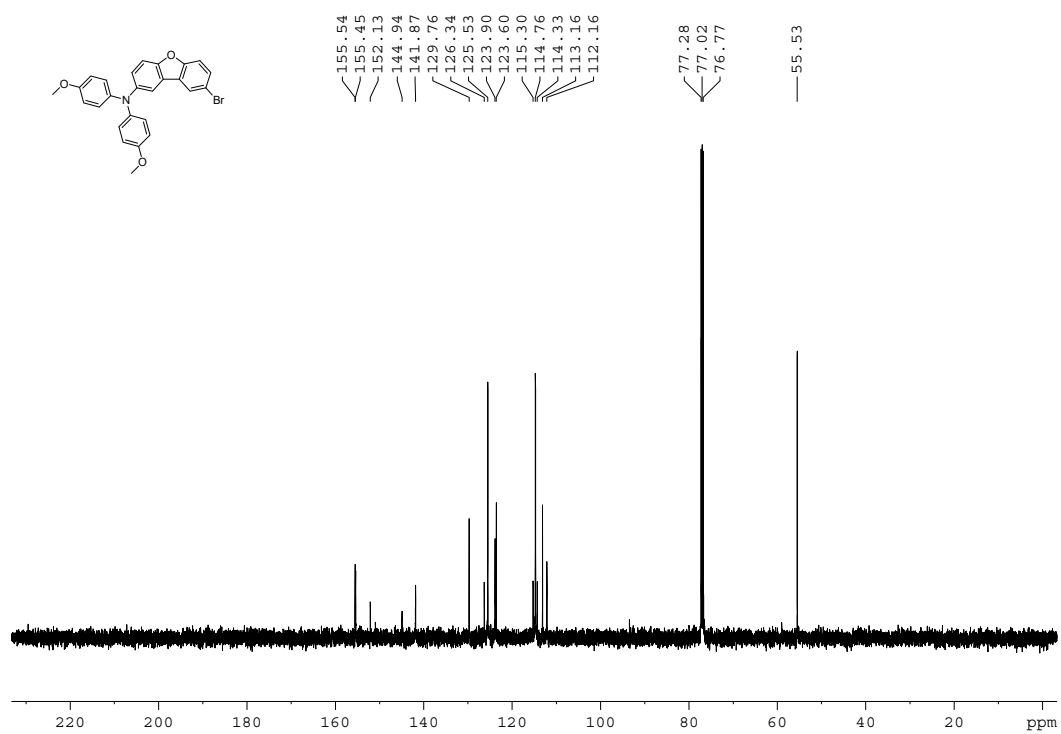

Figure. S7 <sup>13</sup>C NMR spectrum of **2**.

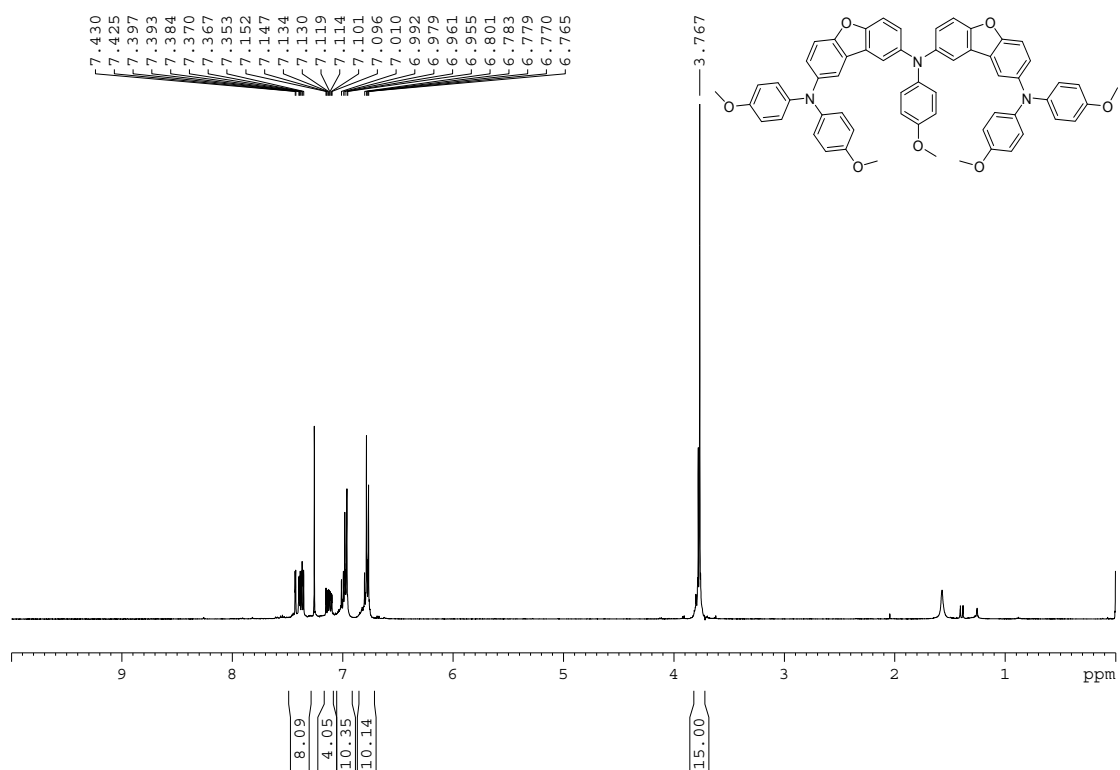

Figure. S8 <sup>1</sup>H NMR spectrum of **bDBF**.

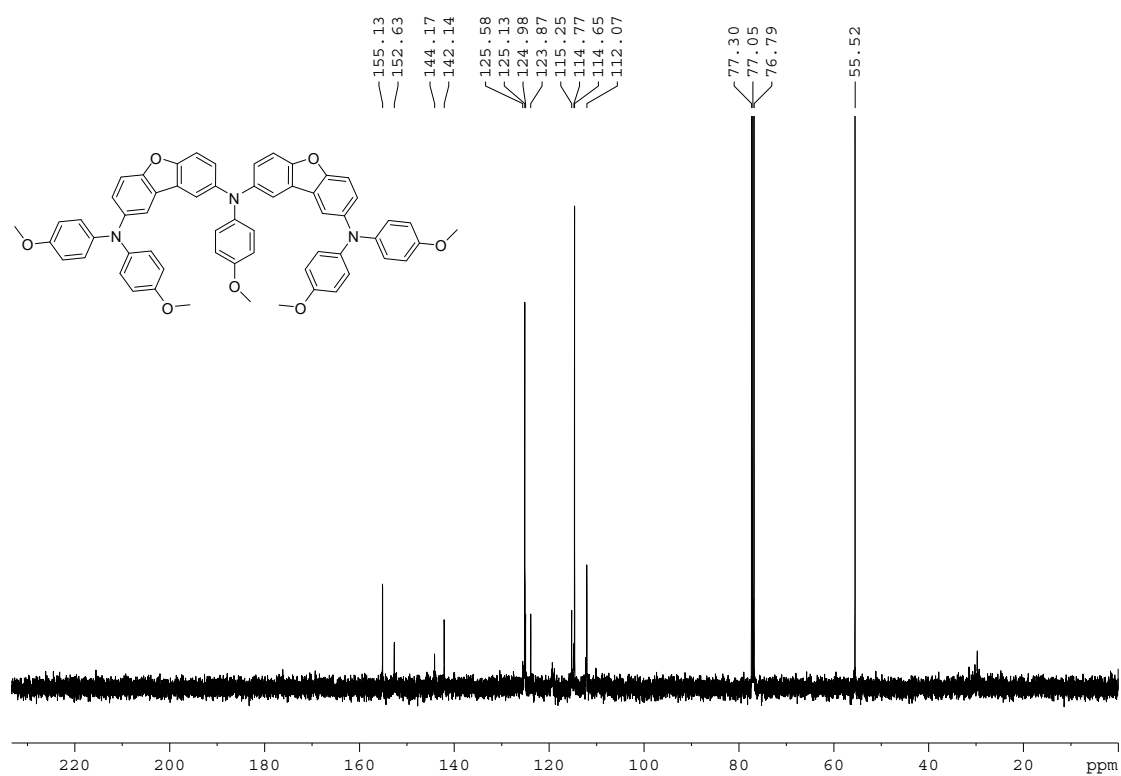

Figure. S9  $^{13}\text{C}$  NMR spectrum of bDBF.

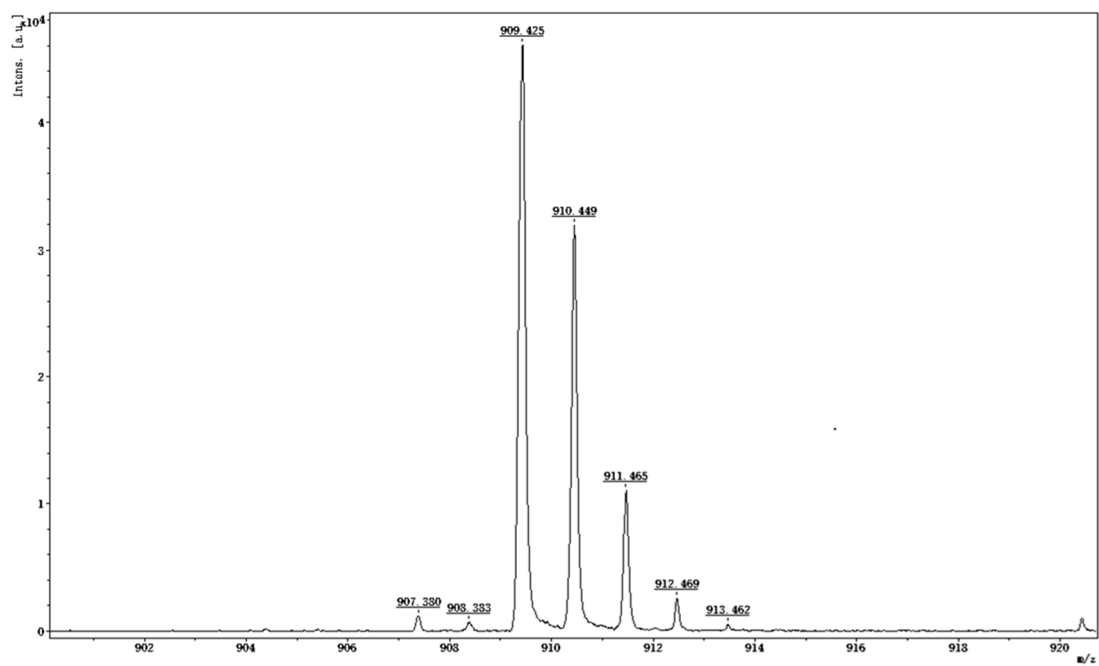

Figure. S10 MALDI-TOF mass spectrometry of bDBF.

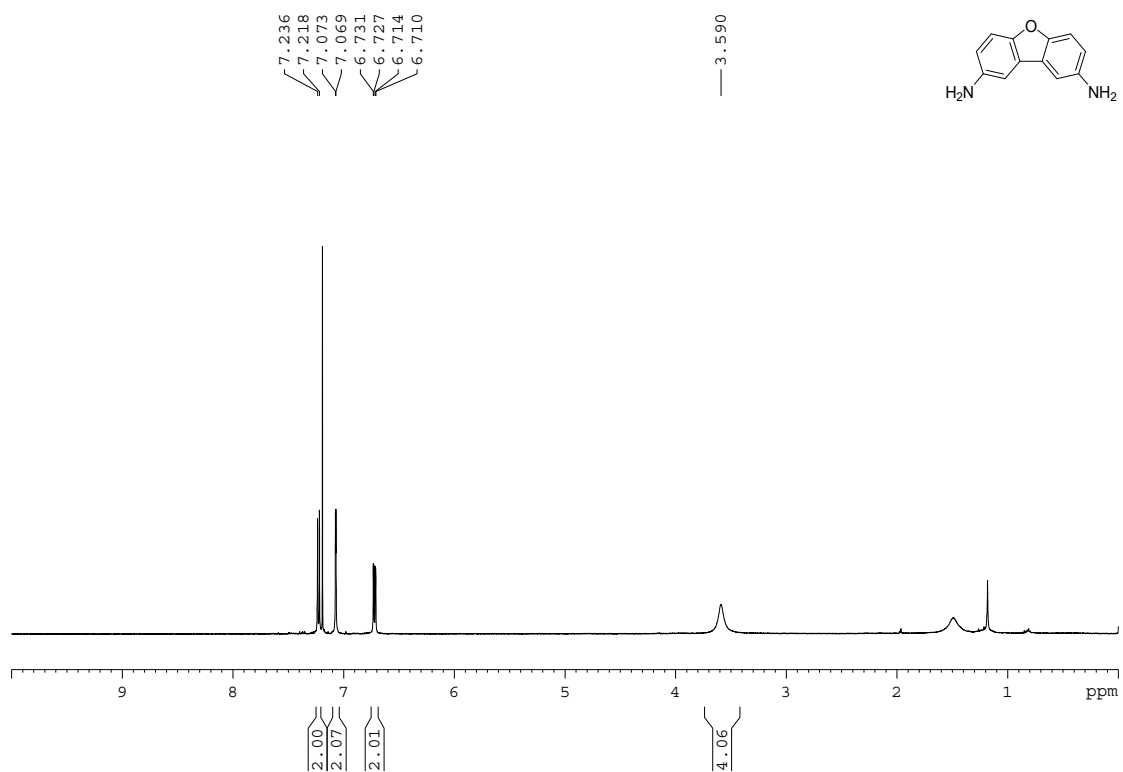

**Figure. S11** <sup>1</sup>H NMR spectrum of **3**.

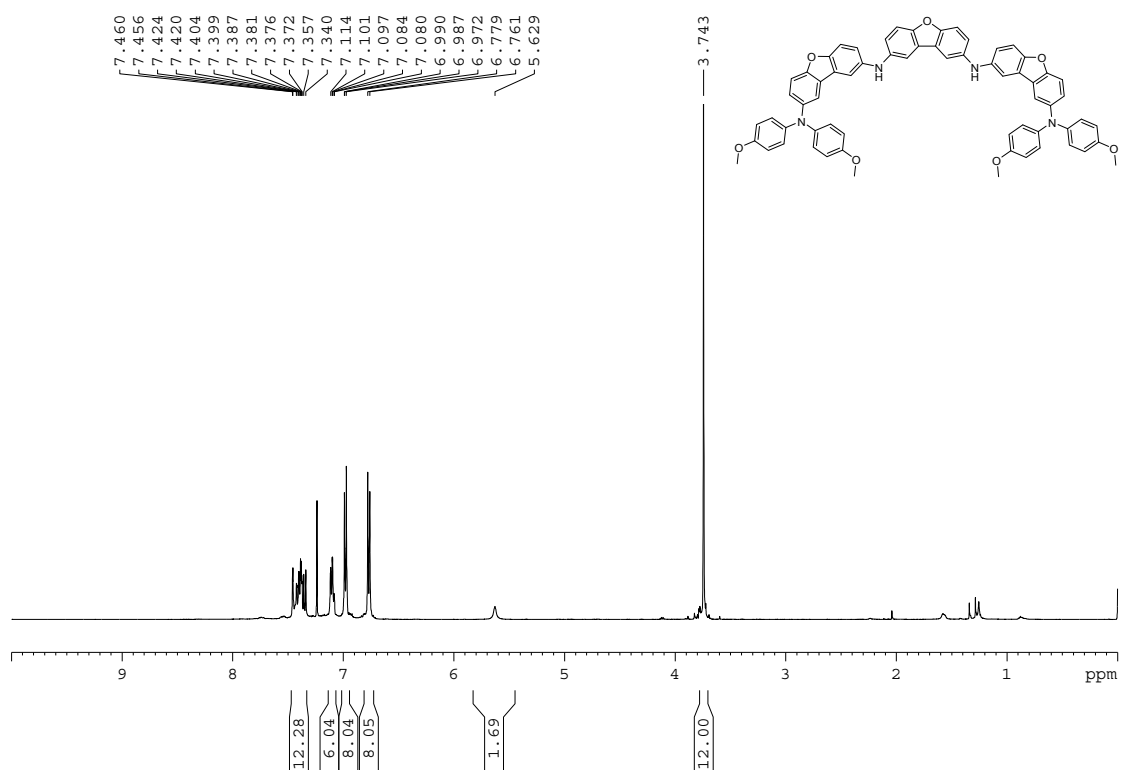

**Figure. S12** <sup>1</sup>H NMR spectrum of **4**.

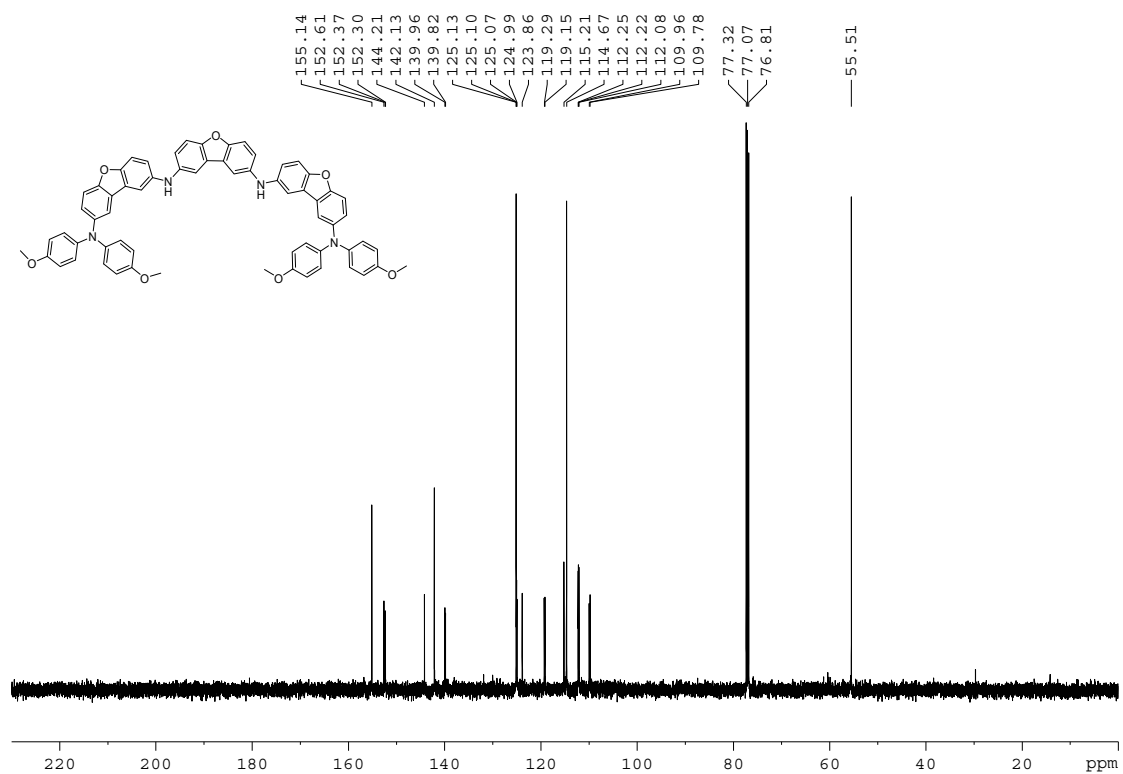

Figure. S13 <sup>13</sup>C NMR spectrum of 4.

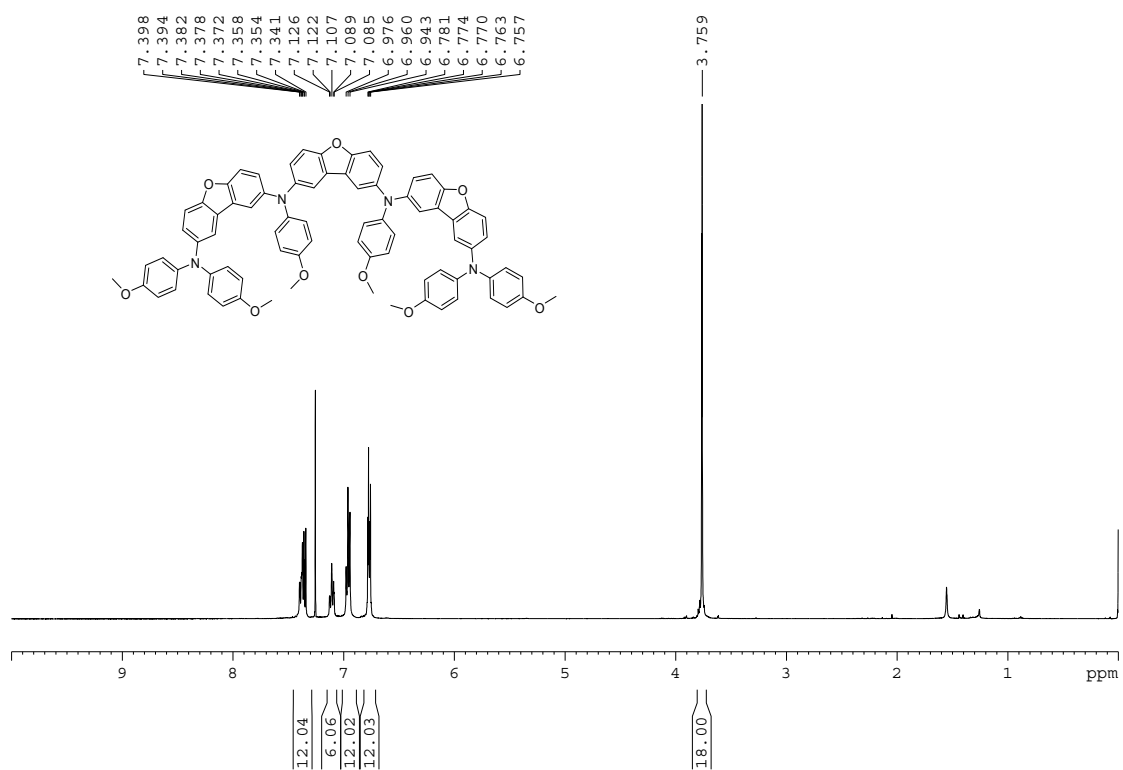

Figure. S14 <sup>1</sup>H NMR spectrum of tDBF.

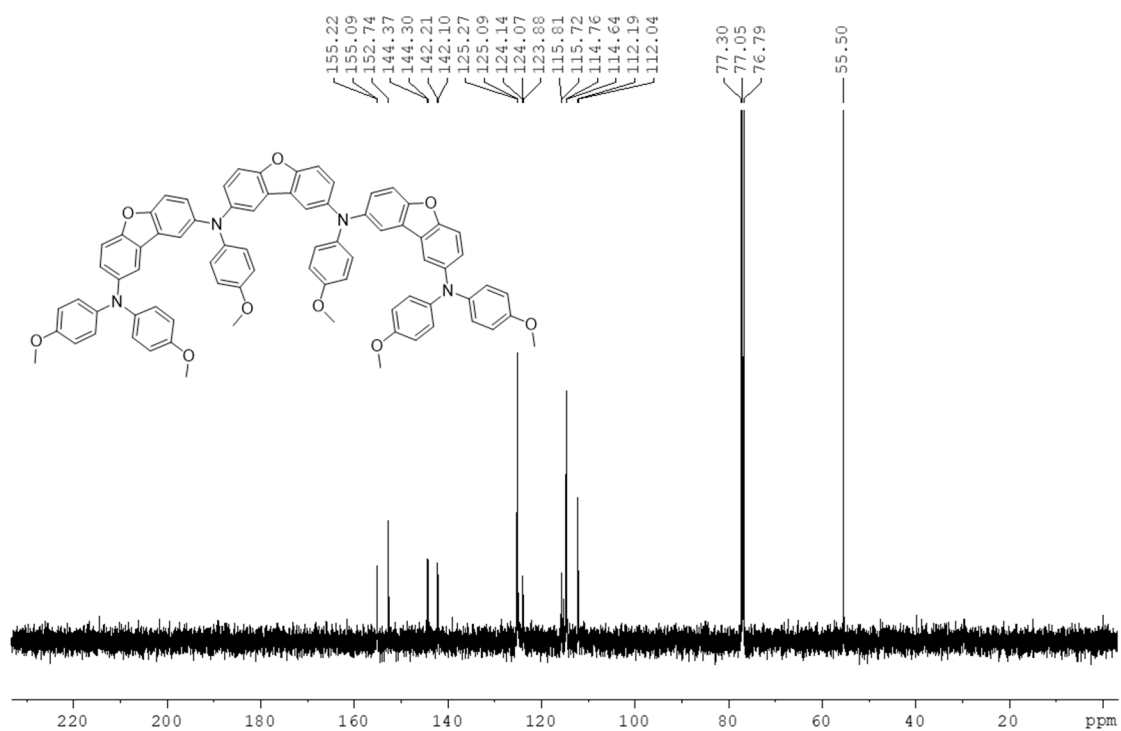

Figure. S15  $^{13}\text{C}$  NMR spectrum of tDBF.

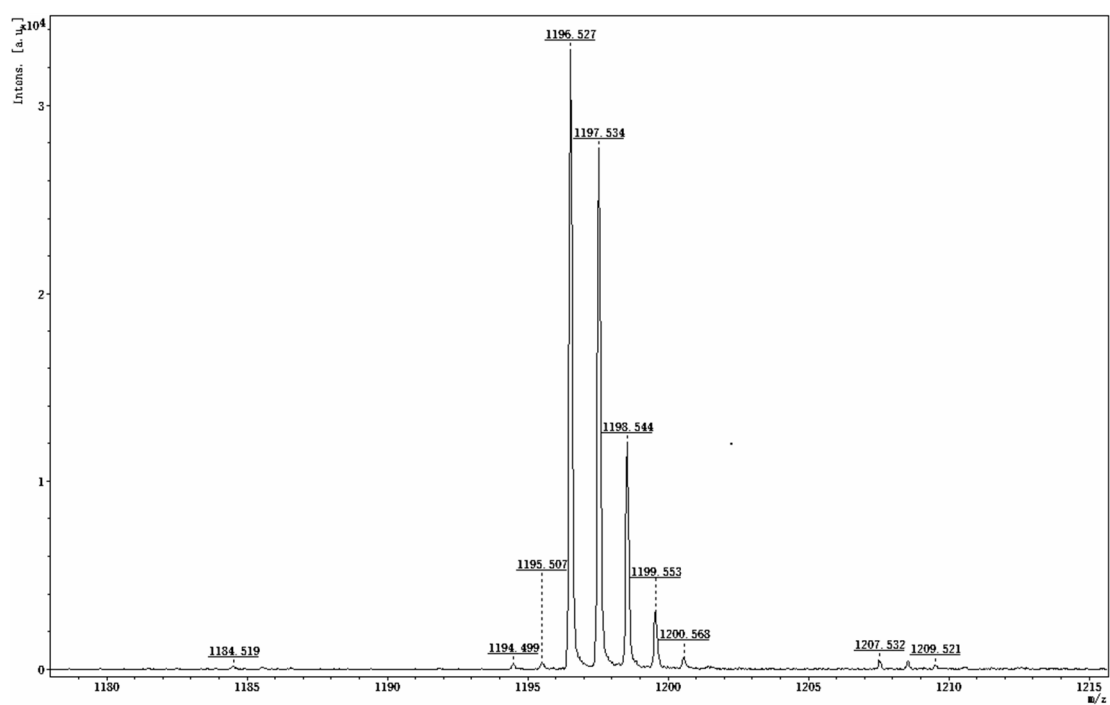

Figure. S16. MALDI-TOF mass spectrometry of tDBF.

## 2. UV-visible absorption

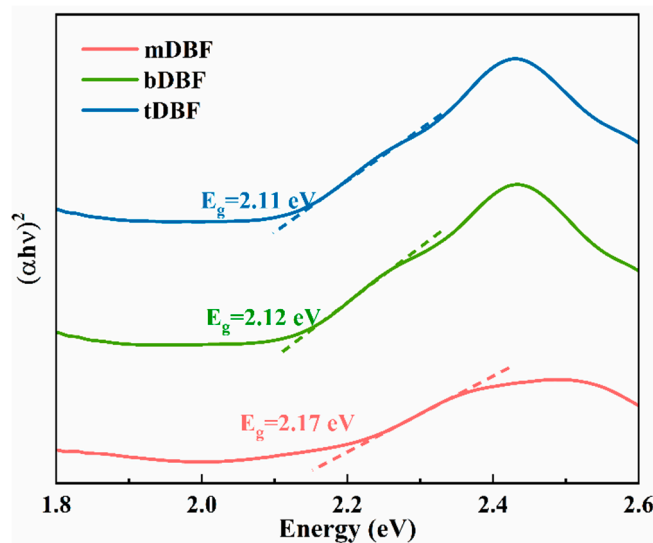

**Figure. S17.** Tauc curves from UV-visible absorption spectrum of the materials in the thin films.

## 3. The PSCs using different HTMs

**Table S1** The relevant parameters obtained from PSCs with different HTMs

| HTM          | Device configuration                                                                                                                                                                       | $V_{oc}$<br>(V) | $J_{sc}$<br>(mA cm <sup>-2</sup> ) | FF<br>(%) | PCE<br>(%) | Ref. |
|--------------|--------------------------------------------------------------------------------------------------------------------------------------------------------------------------------------------|-----------------|------------------------------------|-----------|------------|------|
| P3HT         | FTO/SnO <sub>2</sub> /(FAPbI <sub>3</sub> ) <sub>0.95</sub> (MAPbBr <sub>3</sub> ) <sub>0.05</sub><br>/Ga(acac) <sub>3</sub> +P3HT/Au                                                      | 1.15            | 25.50                              | 83.80     | 24.60      | [1]  |
| CuPc         | FTO/ns-TiO <sub>2</sub> /c-TiO <sub>2</sub> /<br>(FAPbI <sub>3</sub> ) <sub>0.95</sub> (MAPbBr <sub>3</sub> ) <sub>0.05</sub> /PMMA/CuPc/Au                                                | 1.08            | 24.87                              | 79.29     | 21.25      | [2]  |
| CL-MCz       | ITO/CL-MCz/<br>(FA <sub>0.17</sub> MA <sub>0.94</sub> PbI <sub>3.11</sub> ) <sub>0.95</sub> (PbCl <sub>2</sub> ) <sub>0.05</sub> /C <sub>60</sub> /BCP/Ag                                  | 1.17            | 24.15                              | 84.60     | 23.90      | [3]  |
| MeO-2PACz    | PEN(ITO)/MeO-2PACz/3F-2CN+<br>/Cs <sub>0.05</sub> (FA <sub>0.98</sub> MA <sub>0.02</sub> ) <sub>0.95</sub> Pb(I <sub>0.98</sub> Br <sub>0.02</sub> ) <sub>3</sub> /C <sub>60</sub> /BCP/Ag | 1.14            | 25.36                              | 83.57     | 24.08      | [4]  |
| P3CT         | ITO/P3CT/<br>(FA <sub>0.17</sub> MA <sub>0.94</sub> PbI <sub>3.11</sub> ) <sub>0.95</sub> (PbCl <sub>2</sub> ) <sub>0.05</sub> /C <sub>60</sub> /ZrAcac/Ag                                 | 1.12            | 22.88                              | 82.00     | 21.09      | [5]  |
| Spiro-OMeTAD | FTO/SnO <sub>2</sub> /RACl+FAPbI <sub>3</sub> /Spiro-OMeTAD/Au                                                                                                                             | 1.18            | 25.69                              | 86.15     | 26.08      | [6]  |

#### 4. Synthesis cost of HTMs

**Table S2.** Materials quantities and cost for the synthesis of 1-g mDBF, bDBF and tDBF.

| Chemical name<br>(purity)                                        | Price of chemical<br>(RMB/quantity) | Weight or volume of chemical |        |         | Material cost<br>(RMB)                         |                                                  |                                                  |
|------------------------------------------------------------------|-------------------------------------|------------------------------|--------|---------|------------------------------------------------|--------------------------------------------------|--------------------------------------------------|
|                                                                  |                                     | mDBF                         | bDBF   | tDBF    | mDBF                                           | bDBF                                             | tDBF                                             |
| Dibenzo[ <i>b, d</i> ]furan (98%)                                | 107.1/500 g                         | 0.65 g                       | 3.30 g | 5.01 g  | 0.14                                           | 0.71                                             | 1.07                                             |
| Bromine (≥99.5%)                                                 | 239.9/500g                          | 1.36 g                       | 6.91   | 10.46 g | 0.65                                           | 3.32                                             | 5.02                                             |
| Sodium thiosulfate (AR)                                          | 18.8/500g                           | 1.58 g                       | 8.02 g | 3.84 g  | 0.06                                           | 0.30                                             | 0.14                                             |
| Bis-(4-methoxyphenyl)-<br>amine (98%)                            | 231.7/25g                           | 1.00 g                       | 1.15 g | 1.47 g  | 9.27                                           | 10.66                                            | 13.62                                            |
| p-Anisidine                                                      | 27/25g                              |                              | 0.14 g |         |                                                | 0.15                                             |                                                  |
| Tri-tert-butylphosphine<br>tetrafluoroborate (≥98%)              | 34.6/5 g                            | 0.05 g                       | 0.20 g | 0.12 g  | 0.35                                           | 1.38                                             | 0.83                                             |
| Tris(dibenzylideneacetone)<br>dipalladium(0) (99.6%)             | 144.0/1 g                           | 0.07 g                       | 0.35 g | 0.49 g  | 13.72                                          | 50.4                                             | 70.56                                            |
| Cuprous iodide (Macklin<br>(ML), 99.9%)                          | 29.6/g                              |                              |        | 0.11 g  |                                                |                                                  | 3.27                                             |
| (S)-2,2'-<br>bis(diphenylphosphino)-<br>1,1'-binaphthyl (97%)    | 302.4/25 g                          |                              |        | 0.18 g  |                                                |                                                  | 2.18                                             |
| 4,5-<br>Bis(diphenylphosphino)-<br>9,9-dimethylxanthene<br>(98%) | 30.8/5 g                            |                              | 0.20 g | 0.26 g  |                                                | 1.23                                             | 1.60                                             |
| N,N'-<br>Dimethylethylenediamine<br>(97%)                        | 179.1/100 mL                        |                              |        | 0.15 mL |                                                |                                                  | 0.27                                             |
| Sodium tert-butoxide (98%)                                       | 18/ 25 g                            | 0.57g                        | 1.51 g | 2.13 g  | 0.41                                           | 1.09                                             | 1.53                                             |
| Aqueous ammonia (AR)                                             | 12.5/500 mL                         |                              |        | 3.5 mL  |                                                |                                                  | 0.09                                             |
| Sodium sulfate anhydrous<br>(AR)                                 | 15.2/500 g                          |                              |        | 5.21 g  |                                                |                                                  | 0.16                                             |
| Trichloromethane (AR)                                            | 43.2/500 mL                         | 4 mL                         | 20 mL  | 30 mL   | 0.35                                           | 1.73                                             | 2.60                                             |
| Dichloromethane (AR)                                             | 220.0/25 L                          | 302 mL                       | 1.53 L | 2.32 L  | 2.66                                           | 13.46                                            | 20.42                                            |
| Toluene (AR)                                                     | 200.0/25L                           | 120 mL                       | 1.13 L | 1.72 L  | 0.96                                           | 9.04                                             | 13.76                                            |
| Dimethyl sulfoxide (AR)                                          | 72.8/500 mL                         |                              |        | 2.5 mL  |                                                |                                                  | 0.36                                             |
| Petroleum ether (AR)                                             | 150.0/25 L                          | 600 mL                       | 2.31 L | 3.12 L  | 3.60                                           | 13.86                                            | 18.72                                            |
| Ethylacetate (AR)                                                | 225.0/25 L                          | 308 mL                       | 1.09 L | 2.01 L  | 2.77                                           | 9.81                                             | 18.09                                            |
| Column chromatography<br>silica gel (200-300 mesh)<br>(AR)       | 125.0/5kg                           | 50 g                         | 100 g  | 250 g   | 1.25                                           | 2.50                                             | 6.25                                             |
| Total                                                            |                                     |                              |        |         | <b>36.19</b><br><b>(5.11</b><br><b>US\$/g)</b> | <b>119.64</b><br><b>(16.90</b><br><b>US\$/g)</b> | <b>180.54(</b><br><b>25.50</b><br><b>US\$/g)</b> |

## 5. Photovoltaic parameters of the devices

**Table S3** Summary of photovoltaic parameters of n-i-p flexible PSCs employing different HTMs

| HTM                 | $V_{oc}$ (V) | $J_{sc}$ (mA cm <sup>-2</sup> ) | FF (%) | PCE <sub>max</sub> (%) |
|---------------------|--------------|---------------------------------|--------|------------------------|
| <b>Spiro-OMeTAD</b> | 1.04         | 24.05                           | 74.84  | 18.78                  |
| <b>mDBF</b>         | 0.65         | 6.11                            | 66.16  | 2.65                   |
| <b>bDBF</b>         | 1.07         | 23.80                           | 73.60  | 18.66                  |
| <b>tDBF</b>         | 1.08         | 23.54                           | 76.47  | 19.46                  |

## Reference

1. Jeong, M. J.; Yeom, K. M.; Kim, S. J.; Jung, E. H.; Noh, J. H. Spontaneous interface engineering for dopant-free poly(3-hexylthiophene) perovskite solar cells with efficiency over 24%. *Energy Environ. Sci.* **2021**, *14*, 2419.
2. Kim, H.; Lee, K. S.; Paik, M. J.; Lee, D. Y.; Lee, S. U.; Choi, E.; Yun, J. S.; Seok, S. Il. Polymethyl methacrylate as an interlayer between the halide perovskite and copper phthalocyanine layers for stable and efficient perovskite solar cells. *Adv. Funct. Mater.* **2022**, *32*, 2110473.
3. Zhang, C. P.; Liao, Q. G.; Chen, J. Y.; Li, B. L.; Xu, C. Y.; Wei, K.; Du, G. Z.; Wang, Y.; Liu, D. C.; Deng, J. D.; Luo, Z. D.; Pang, S. P.; Yang, Y.; Li, J. R.; Li Yang, Guo, X. G.; Zhang, J. B. Thermally crosslinked hole conductor enables stable inverted perovskite solar cells with 23.9% efficiency. *Adv. Mater.* **2023**, *35*, 2209422.
4. Xie, L. S.; Du, S. Y.; Li, J.; Liu, C.; Pu, Z. W.; Tong, X. Y.; Liu, J.; Wang, Y. H.; Meng, Y. Y.; Yang, M. J.; Wei Li, W.; Ziyi Ge, Z. Y. Molecular dipole engineering-assisted strain release for mechanically robust flexible perovskite solar cells. *Energy Environ. Sci.* **2023**, *16*, 5423–5433.
5. Liao, Q.; Wang, Y.; Yao, X.; Su, M.; Li, B.; Sun, H.; Huang, J.; Guo, X. A. Dual-functional conjugated polymer as an efficient hole-transporting layer for high-performance inverted perovskite solar cells. *ACS Appl. Mater. Interfaces* **2021**, *13*, 16744–16753.
6. Park, J.; Kim, J.; Yun, H.-S.; Paik, M. J.; Noh, E.; Mun, H. J.; Kim, M. G.; Shin, T. J.; Seok, S. Il. Controlled growth of perovskite layers with volatile alkylammonium chlorides. *Nature* **2023**, *616*, 724.
